# Supplementary material
Source: publisher figshare collection journal article supplement (https://diabetesjournals.figshare.com/ndownloader/files/32606729)
Supplement: Supplementary file 1 [file 32606729]

Supplemental Table 5. SNP association with one year change in WCadjBMI in lifestyle intervention among White participants
Marker	rs number		k	beta	se	lower	upper	Z	pval	I2	pval.Q			bon_p	fdr_p
snp1	rs2645294		5	0	0.004	-0.008	0.008	-0.033	0.973	0.538	0.07			1	0.996
snp2	rs905938		5	-0.004	0.005	-0.013	0.006	-0.758	0.448	0.061	0.372			1	0.906
snp3	rs10919388		5	0.007	0.005	-0.002	0.017	1.573	0.116	0	0.983			1	0.906
snp4	rs714515		5	-0.002	0.004	-0.01	0.007	-0.398	0.691	0	0.731			1	0.906
snp5	rs2820443		5	0.002	0.005	-0.008	0.011	0.34	0.734	0	0.422			1	0.921
snp6	rs1385167		5	-0.007	0.006	-0.019	0.005	-1.108	0.268	0	0.611			1	0.906
snp7	rs10195252		5	0.005	0.004	-0.004	0.013	1.097	0.273	0	0.461			1	0.906
snp8	rs1569135		5	-0.001	0.004	-0.009	0.008	-0.144	0.885	0	0.58			1	0.996
snp9	rs17819328		5	-0.001	0.004	-0.009	0.008	-0.128	0.898	0	0.41			1	0.996
snp10	rs2276824		5	0.01	0.004	0.002	0.019	2.371	0.018	0	0.708			1	0.807
snp11	rs2371767		5	0.004	0.005	-0.005	0.014	0.947	0.344	0.41	0.148			1	0.906
snp12	rs10804591		5	0.002	0.005	-0.008	0.012	0.437	0.662	0.073	0.365			1	0.906
snp13	rs17451107		5	0.003	0.004	-0.006	0.011	0.601	0.548	0	0.596			1	0.906
snp14	rs3805389		5	0	0.005	-0.01	0.01	-0.01	0.992	0.238	0.263			1	0.996
snp15	rs9991328		5	-0.002	0.004	-0.01	0.007	-0.425	0.671	0	0.673			1	0.906
snp16	rs303084		5	0.005	0.005	-0.005	0.015	0.955	0.34	0	0.556			1	0.906
snp17	rs9687846		5	0.001	0.005	-0.009	0.011	0.181	0.856	0	0.716			1	0.996
snp18	rs1045241		5	0.002	0.005	-0.007	0.011	0.43	0.667	0	0.646			1	0.906
snp19	rs7705502		5	0	0.005	-0.009	0.009	0.1	0.92	0	0.482			1	0.996
snp20	rs6556301		5	0.004	0.005	-0.005	0.014	0.96	0.337	0	0.528			1	0.906
snp21	rs1294410		5	0	0.004	-0.009	0.009	0.005	0.996	0	0.524			1	0.996
snp22	rs7759742		4	-0.003	0.006	-0.014	0.008	-0.529	0.597	0	0.988			1	0.906
snp23	rs1776897		5	0.006	0.007	-0.009	0.02	0.77	0.442	0.32	0.208			1	0.906
snp24	rs1358980		5	0.006	0.004	-0.003	0.014	1.295	0.195	0	0.533			1	0.906
snp25	rs1936805		5	0.002	0.004	-0.007	0.01	0.373	0.709	0	0.558			1	0.909
snp26	rs10245353		5	-0.003	0.005	-0.013	0.008	-0.471	0.638	0	0.88			1	0.906
snp27	rs7801581		5	0.002	0.005	-0.008	0.013	0.436	0.663	0	0.946			1	0.906
snp28	rs7830933		5	0	0.005	-0.01	0.01	-0.058	0.954	0	0.717			1	0.996
snp29	rs12679556		5	0.001	0.005	-0.008	0.011	0.299	0.765	0	0.778			1	0.94
snp30	rs10991437		5	0.007	0.007	-0.006	0.02	1.061	0.289	0.325	0.205			1	0.906
snp31	rs7917772		5	-0.005	0.004	-0.014	0.004	-1.085	0.278	0	0.523			1	0.906
snp32	rs11231693		5	-0.005	0.009	-0.022	0.012	-0.582	0.56	0.217	0.276			1	0.906
snp33	rs10842707		4	-0.004	0.005	-0.015	0.006	-0.787	0.431	0	0.501			1	0.906
snp34	rs1443512		5	0.003	0.005	-0.007	0.012	0.512	0.609	0.076	0.363			1	0.906
snp35	rs4765219		5	0.002	0.005	-0.007	0.011	0.417	0.677	0	0.906			1	0.906
snp36	rs8042543		5	0.007	0.005	-0.004	0.017	1.258	0.208	0	0.515			1	0.906
snp37	rs8030605		5	0.008	0.006	-0.004	0.02	1.366	0.172	0	0.994			1	0.906
snp38	rs1440372		5	0.003	0.005	-0.006	0.013	0.721	0.471	0.035	0.387			1	0.906
snp39	rs2925979		5	0	0.005	-0.009	0.009	0.087	0.93	0	0.843			1	0.996
snp40	rs4646404		5	-0.003	0.005	-0.012	0.006	-0.674	0.501	0	0.519			1	0.906
snp41	rs8066985		5	0.003	0.004	-0.006	0.011	0.628	0.53	0	0.716			1	0.906
snp42	rs12454712		5	-0.003	0.004	-0.012	0.006	-0.685	0.494	0.088	0.356			1	0.906
snp43	rs12608504		5	0.005	0.004	-0.003	0.014	1.265	0.206	0.032	0.388			1	0.906
snp44	rs4081724		5	-0.005	0.006	-0.016	0.007	-0.759	0.448	0	0.432			1	0.906
snp45	rs979012		5	0.007	0.004	-0.001	0.016	1.628	0.104	0	0.872			1	0.906
snp46	rs224333		5	-0.006	0.004	-0.014	0.003	-1.283	0.2	0.177	0.302			1	0.906
snp47	rs6090583		5	-0.004	0.004	-0.012	0.004	-0.92	0.358	0.468	0.111			1	0.906
snp48	rs2294239		5	0	0.004	-0.009	0.009	0.02	0.984	0.516	0.082			1	0.996
snp49	rs1534696		4	-0.01	0.005	-0.019	-0.001	-2.207	0.027	0	0.742			1	0.807
snp50	rs10925060		3	-0.011	0.02	-0.051	0.028	-0.554	0.58	0.432	0.172			1	0.906
snp51	rs2124969		5	0.001	0.004	-0.008	0.009	0.147	0.883	0.491	0.097			1	0.996
snp52	rs1664789		5	0.005	0.004	-0.003	0.014	1.166	0.243	0.195	0.291			1	0.906
snp53	rs17472426		5	-0.009	0.008	-0.024	0.006	-1.178	0.239	0	0.601			1	0.906
snp54	rs1144		5	-0.003	0.004	-0.012	0.006	-0.664	0.506	0	0.513			1	0.906
snp55	rs178420		3	-0.013	0.028	-0.068	0.043	-0.444	0.657	0	0.438			1	0.906
snp56	rs2047937		5	0.005	0.005	-0.005	0.014	0.943	0.346	0	0.425			1	0.906
snp57	rs2398893		5	-0.002	0.005	-0.011	0.007	-0.483	0.629	0	0.886			1	0.906
snp58	rs1394461		3	0.012	0.008	-0.002	0.027	1.636	0.102	0	0.875			1	0.906
snp59	rs319564		5	0.003	0.004	-0.005	0.012	0.797	0.426	0	0.495			1	0.906
